# Supplementary material
Source: PubMed Central journal article supplement (PMC6556770)
Supplement: NIHMS1033080-supplement-1.pdf [file NIHMS1033080-supplement-1.pdf]

Table S1. Descriptive Statistics, Mean (sd) or Number (%), Selected Variables by Country, Men and Women Combined, INTERMAP, 1996-1999

| Variable                     | Japan<br>(n=1,145) |        | P. R. China<br>(n=839) |         | UK<br>(n=501) |        | USA<br>(n=2,195) |        | All<br>(n=4,680) |        |
|------------------------------|--------------------|--------|------------------------|---------|---------------|--------|------------------|--------|------------------|--------|
|                              | Mean               | (sd)   | Mean                   | (sd)    | Mean          | (sd)   | Mean             | (sd)   | Mean             | (sd)   |
| Age (years)                  | 49.4               | (5.3)  | 49.0                   | (5.8)   | 49.1          | (5.6)  | 49.1             | (5.4)  | 49.2             | (5.5)  |
| Systolic BP (mm Hg)          | 117.2              | (13.8) | 121.3                  | (17.4)  | 120.4         | (14.6) | 118.6            | (13.9) | 118.9            | (14.7) |
| Diastolic BP (mm Hg)         | 73.6               | (10.3) | 73.2                   | (10.2)  | 77.3          | (9.9)  | 73.4             | (9.7)  | 73.8             | (10.0) |
| Total Omega-3 PFA (% kcal)   | 1.35               | (0.38) | 0.55                   | (0.37)  | 0.73          | (0.26) | 0.75             | (0.31) | 0.86             | (0.44) |
| Linolenic acid (%kcal)       | 0.81               | (0.26) | 0.54                   | (0.37)  | 0.57          | (0.20) | 0.67             | (0.27) | 0.67             | (0.30) |
| Sum, EPA+DHA+DPA<br>(% kcal) | 0.50               | (0.29) | 0.01                   | (0.02)  | 0.15          | (0.17) | 0.08             | (0.13) | 0.18             | (0.26) |
| Sum, EPA + DHA (% kcal)      | 0.46               | (0.26) | 0.01                   | (0.02)  | 0.12          | (0.15) | 0.07             | (0.12) | 0.16             | (0.24) |
| EPA (%kcal)                  | 0.17               | (0.11) | 0.01                   | (0.02)  | 0.05          | (0.07) | 0.02             | (0.04) | 0.06             | (0.09) |
| DHA (%kcal)                  | 0.29               | (0.16) | 0.002                  | (0.007) | 0.06          | (0.08) | 0.04             | (0.08) | 0.10             | (0.15) |

continued on next page

Table S1 continued, page 2

|                                      |        |         |        |         |        |         |        |         |        |         |
|--------------------------------------|--------|---------|--------|---------|--------|---------|--------|---------|--------|---------|
| DPA (%kcal)                          | 0.05   | (0.03)  | 0.0004 | (0.001) | 0.04   | (0.02)  | 0.01   | (0.01)  | 0.02   | (0.03)  |
| Total Omega-3 PFA (g/24hr)           | 3.07   | (1.12)  | 1.25   | (0.92)  | 1.76   | (0.80)  | 1.87   | (0.93)  | 2.04   | (1.15)  |
| Linolenic acid (g/24hr)              | 1.84   | (0.73)  | 1.23   | (0.91)  | 1.39   | (0.64)  | 1.69   | (0.84)  | 1.61   | (0.84)  |
| Sum, EPA+DHA+DPA<br>(g/24hr)         | 1.15   | (0.73)  | 0.02   | (0.05)  | 0.36   | (0.38)  | 0.18   | (0.31)  | 0.41   | (0.61)  |
| Sum, EPA+DHA (g/24hr)                | 1.04   | (0.66)  | 0.02   | (0.04)  | 0.27   | (0.34)  | 0.15   | (0.28)  | 0.36   | (0.56)  |
| EPA (g/24hr)                         | 0.39   | (0.28)  | 0.02   | (0.04)  | 0.12   | (0.16)  | 0.05   | (0.10)  | 0.13   | (0.22)  |
| DHA (g/24hr)                         | 0.66   | (0.39)  | 0.01   | (0.02)  | 0.15   | (0.20)  | 0.10   | (0.19)  | 0.23   | (0.35)  |
| DPA (g/24hr)                         | 0.10   | (0.08)  | 0.001  | (0.003) | 0.09   | (0.06)  | 0.02   | (0.04)  | 0.05   | (0.07)  |
| Height (m)                           | 1.61   | (0.09)  | 1.59   | (0.08)  | 1.69   | (0.09)  | 1.68   | (0.10)  | 1.65   | (0.10)  |
| Weight (kg)                          | 61.2   | (10.2)  | 58.9   | (10.0)  | 78.2   | (15.3)  | 82.3   | (19.6)  | 72.5   | (19.0)  |
| Body Mass Index (kg/m <sup>2</sup> ) | 23.4   | (2.9)   | 23.1   | (3.4)   | 27.5   | (4.6)   | 28.9   | (5.9)   | 26.4   | (5.5)   |
| Energy (kcal/24hr)                   | 2038.6 | (449.0) | 2035.8 | (576.8) | 2168.0 | (631.8) | 2244.2 | (698.7) | 2148.4 | (624.5) |
| Total protein (% kcal)               | 16.0   | (2.3)   | 12.4   | (1.9)   | 15.8   | (3.1)   | 15.5   | (3.2)   | 15.1   | (3.1)   |

continued on next page

Table S1 continued, page 3

|                                          |       |        |      |        |       |        |       |        |       |        |
|------------------------------------------|-------|--------|------|--------|-------|--------|-------|--------|-------|--------|
| Vegetable protein (% kcal)               | 7.1   | (1.1)  | 9.9  | (1.3)  | 6.1   | (1.4)  | 5.2   | (1.6)  | 6.6   | (2.2)  |
| Total fat (% kcal)                       | 24.9  | (5.0)  | 20.0 | (6.1)  | 32.8  | (6.5)  | 32.9  | (6.9)  | 28.6  | (8.2)  |
| Total SFA (% kcal)                       | 6.6   | (1.8)  | 5.0  | (2.0)  | 12.1  | (3.3)  | 10.7  | (2.8)  | 8.8   | (3.6)  |
| Total MFA (%kcal)                        | 9.0   | (2.2)  | 8.1  | (2.8)  | 11.0  | (2.5)  | 12.2  | (2.9)  | 10.5  | (3.2)  |
| Oleic acid (%kcal)                       | 8.0   | (2.0)  | 6.7  | (2.8)  | 10.0  | (2.3)  | 11.6  | (2.8)  | 9.6   | (3.2)  |
| Total PFA (% kcal)                       | 6.4   | (1.5)  | 5.8  | (2.2)  | 6.2   | (1.9)  | 7.0   | (2.2)  | 6.5   | (2.1)  |
| Omega-6 PFA (% kcal)                     | 5.0   | (1.3)  | 5.3  | (2.1)  | 5.5   | (1.8)  | 6.3   | (2.0)  | 5.7   | (2.0)  |
| Linoleic acid (%kcal)                    | 4.9   | (1.3)  | 5.3  | (2.1)  | 5.4   | (1.8)  | 6.2   | (2.0)  | 5.7   | (2.0)  |
| Arachidonic acid (%kcal)                 | 0.07  | (0.02) | 0.02 | (0.02) | 0.08  | (0.04) | 0.06  | (0.04) | 0.06  | (0.04) |
| Trans fatty acids (% kcal)               | 0.44  | (0.30) | 0.18 | (0.34) | 1.36  | (0.61) | 1.94  | (0.80) | 1.20  | (0.98) |
| Cholesterol (mg/1,000kcal)               | 197.2 | (66.9) | 89.0 | (85.9) | 120.4 | (48.3) | 131.4 | (58.8) | 138.7 | (75.0) |
| Total available carbohydrate<br>(% kcal) | 54.2  | (7.3)  | 65.0 | (10.0) | 44.5  | (6.6)  | 49.4  | (8.1)  | 52.9  | (10.3) |

continued on next page

Table S1 continued, page 4

|                            |       |         |       |         |       |         |       |         |       |         |
|----------------------------|-------|---------|-------|---------|-------|---------|-------|---------|-------|---------|
| Estimated total sugars     |       |         |       |         |       |         |       |         |       |         |
| (%kcal)                    | 18.7  | (4.7)   | 8.5   | (5.2)   | 20.3  | (6.0)   | 26.7  | (8.2)   | 20.8  | (9.5)   |
| 7-Day alcohol* (g/24hr)    | 17.0  | (22.6)  | 8.6   | (21.4)  | 14.7  | (19.2)  | 7.0   | (13.7)  | 10.5  | (18.8)  |
| 7-Day alcohol among        |       |         |       |         |       |         |       |         |       |         |
| drinkers* (g/24hr)         | 18.8  | (23.0)  | 18.9  | (28.4)  | 16.6  | (19.6)  | 9.9   | (15.4)  | 14.5  | (20.7)  |
| Dietary calcium            |       |         |       |         |       |         |       |         |       |         |
| (mg/1,000 kcal)            | 305.6 | (108.7) | 149.3 | (56.2)  | 445.4 | (118.7) | 363.0 | (142.0) | 319.5 | (149.2) |
| Dietary magnesium          |       |         |       |         |       |         |       |         |       |         |
| (mg/1,000 kcal)            | 134.4 | (25.2)  | 154.6 | (46.6)  | 153.8 | (35.2)  | 148.1 | (40.0)  | 146.5 | (38.5)  |
| Dietary phosphorus         |       |         |       |         |       |         |       |         |       |         |
| (mg/1,000 kcal)            | 562.6 | (94.4)  | 438.9 | (113.2) | 662.0 | (125.9) | 591.0 | (124.6) | 564.4 | (132.8) |
| Vitamin E (mg/1,000kcal)   | 4.95  | (1.41)  | 5.29  | (1.62)  | 4.48  | (1.59)  | 4.48  | (1.80)  | 4.74  | (1.69)  |
| Fiber (g/1,000 kcal)       | 7.9   | (2.3)   | 14.2  | (3.8)   | 12.2  | (3.8)   | 9.0   | (3.4)   | 10.0  | (4.0)   |
| Urinary sodium (mmol/24hr) | 198.3 | (56.2)  | 227.5 | (100.3) | 145.2 | (49.1)  | 162.6 | (59.4)  | 181.1 | (72.4)  |

continued on next page

Table S1 continued, page 5

|                                  |       |        |       |         |       |        |       |        |       |        |
|----------------------------------|-------|--------|-------|---------|-------|--------|-------|--------|-------|--------|
| Urinary potassium                |       |        |       |         |       |        |       |        |       |        |
| (mmol/24hr)                      | 48.9  | (13.6) | 38.3  | (12.7)  | 68.2  | (20.1) | 57.7  | (20.9) | 53.2  | (20.0) |
| Urinary Creatinine (mmol/24hr)   | 11.09 | (2.99) | 9.20  | (2.62)  | 12.58 | (3.45) | 13.36 | (4.11) | 11.97 | (3.89) |
| Ratio of Urinary Na to           |       |        |       |         |       |        |       |        |       |        |
| Creatinine (mmol/mmol)           | 18.74 | (5.95) | 25.70 | (11.09) | 12.03 | (4.05) | 12.60 | (4.07) | 16.39 | (8.12) |
| Ratio of Urinary K to Creatinine |       |        |       |         |       |        |       |        |       |        |
| (mmol/mmol)                      | 4.67  | (1.67) | 4.38  | (1.70)  | 5.62  | (1.51) | 4.51  | (1.58) | 4.64  | (1.66) |
|                                  | n     | (%)    | n     | (%)     | n     | (%)    | n     | (%)    | n     | (%)    |
| Family history of hypertension   |       |        |       |         |       |        |       |        |       |        |
| in any first degree relative     |       |        |       |         |       |        |       |        |       |        |
| -Yes                             | 528   | (46.1) | 298   | (35.5)  | 242   | (48.3) | 1,491 | (67.9) | 2,559 | (54.7) |
| -Unknown                         | 406   | (35.5) | 188   | (22.4)  | 188   | (37.5) | 489   | (22.3) | 1,271 | (27.2) |
| Current alcohol drinkers         | 1,039 | (90.7) | 382   | (45.5)  | 444   | (88.6) | 1,533 | (69.8) | 3,398 | (72.6) |

continued on next page

Table S1 continued, page 6

|                                                                                                        |     |        |     |        |     |        |       |        |       |        |
|--------------------------------------------------------------------------------------------------------|-----|--------|-----|--------|-----|--------|-------|--------|-------|--------|
| Special diet: weight loss, weight gain, vegetarian, salt reduced, diabetic, fat modified, or any other | 76  | (6.6)  | 45  | (5.4)  | 106 | (21.2) | 401   | (18.3) | 628   | (13.4) |
| Taking dietary supplement                                                                              | 243 | (21.2) | 34  | (4.1)  | 191 | (38.1) | 1,136 | (51.8) | 1,604 | (34.3) |
| High blood pressure <sup>†</sup>                                                                       | 153 | (13.4) | 145 | (17.3) | 116 | (23.2) | 595   | (27.1) | 1,009 | (21.6) |
| History of heart attack, other heart disease, stroke, or diabetes                                      | 131 | (11.4) | 59  | (7.0)  | 54  | (10.8) | 343   | (15.6) | 587   | (12.5) |
| Taking lipid lowering drugs                                                                            | 37  | (3.2)  | 6   | (0.7)  | 15  | (3.0)  | 146   | (6.7)  | 204   | (4.4)  |
| Taking prescribed drug treatment for high BP/CVD                                                       | 85  | (7.4)  | 66  | (7.9)  | 82  | (16.4) | 518   | (23.6) | 751   | (16.0) |
| Taking diuretic for other reason                                                                       | 3   | (0.3)  | 1   | (0.1)  | 5   | (1.0)  | 25    | (1.1)  | 34    | (0.7)  |
| Taking prescribed drug treatment for diabetes                                                          | 18  | (1.6)  | 11  | (1.3)  | 6   | (1.2)  | 128   | (5.8)  | 163   | (3.5)  |

continued on next page

Table S1 continued, page 7

|                                |    |       |    |       |    |       |     |        |     |       |
|--------------------------------|----|-------|----|-------|----|-------|-----|--------|-----|-------|
| Taking non-steroidal           |    |       |    |       |    |       |     |        |     |       |
| anti-inflammatory drug (NSAID) | 48 | (4.2) | 17 | (2.0) | 41 | (8.2) | 235 | (10.7) | 341 | (7.3) |

PFA is polyunsaturated fatty acids; EPA is eicosapentaenoic acid; DHA is docosahexaenoic acid; DPA is docosapentaenoic acid, SFA is saturated fatty acids, MFA is monounsaturated fatty acids

\*Average daily alcohol intake, from two histories per person of daily alcohol intake during the preceding 7 days

†SBP  $\geq$ 140 mm Hg or DBP  $\geq$ 90 mmHg or reporting use of medication for high BP
